# Supplementary material for: ZeroBind: a protein-specific zero-shot predictor with subgraph matching for drug-target interactions
Source: PubMed Central journal article supplement (PMC10687269; doi:10.1038/s41467-023-43597-1), 2023-11-29
Supplement: 41467_2023_43597_MOESM1_ESM.pdf [file 41467_2023_43597_MOESM1_ESM.pdf]

# ZeroBind: A protein-specific zero-shot predictor with subgraph matching for drug-target interactions

Yuxuan Wang<sup>1</sup>, Ying Xia<sup>1</sup>, Junchi Yan<sup>2</sup>, Ye Yuan<sup>1</sup>, Hong-Bin Shen<sup>1</sup>, Xiaoyong Pan<sup>1\*</sup>

<sup>1</sup>Institute of Image Processing and Pattern Recognition, Shanghai Jiao Tong University, and Key Laboratory of System Control and Information Processing, Ministry of Education of China, Shanghai 200240, China.

<sup>2</sup>Department of Computer Science and Engineering, and MoE Key Lab of Artificial Intelligence, AI Institute, Shanghai Jiao Tong University, Shanghai, 200240, China

\*Corresponding authors: X. Pan, [2008xypan@sjtu.edu.cn](mailto:2008xypan@sjtu.edu.cn)

## Supplementary information

**Supplementary Table 1. Zero-shot performance evaluation with ZeroBind and baseline methods on three independent test sets.** The average is reported after performing each experiment five times, along with the standard deviation. The bold face indicates the method is the best across the compared methods.

| Metric | Method          | Transductive test    | Semi-inductive test  | Inductive test       |
|--------|-----------------|----------------------|----------------------|----------------------|
| AUROC  | DeepConv-DTI    | 0.8831±0.0051*       | 0.7541±0.0049*       | 0.6973±0.0157*       |
|        | GraphDTA        | 0.9122±0.0042*       | 0.7559±0.0041*       | 0.7282±0.0124*       |
|        | Deeppurpose     | 0.9035±0.0081*       | 0.7875±0.0072*       | 0.7873±0.0071*       |
|        | AI-bind         | 0.9156±0.0047*       | 0.7453±0.0126*       | 0.7868±0.0048*       |
|        | DrugBAN         | 0.9256±0.0046*       | 0.7871±0.0047*       | 0.7584±0.0072*       |
|        | <b>ZeroBind</b> | <b>0.9521±0.0034</b> | <b>0.8681±0.0052</b> | <b>0.8139±0.0035</b> |
| AUPRC  | DeepConv-DTI    | 0.9686±0.0062*       | 0.9524±0.0102*       | 0.9386±0.0042*       |
|        | GraphDTA        | 0.9654±0.0035*       | 0.9691±0.0034*       | 0.9573±0.0032*       |
|        | Deeppurpose     | 0.9798±0.0027*       | 0.9764±0.0048*       | 0.9721±0.0049*       |
|        | AI-bind         | 0.9653±0.0051*       | 0.9786±0.0053*       | 0.9754±0.0031*       |
|        | DrugBAN         | 0.9763±0.0048*       | 0.9640±0.0016*       | 0.9615±0.0088*       |
|        | <b>ZeroBind</b> | <b>0.9896±0.0018</b> | <b>0.9880±0.0041</b> | <b>0.9872±0.0037</b> |

\*P-value of two-sided t-test is <0.05

**Supplementary Table 2. Few-shot performance evaluation of ZeroBind with baseline methods on the few-shot test sets.** The average is reported after performing each experiment five times, along with the standard deviation. Two-sided The bold face indicates the method is the best across the compared methods

| Method       | Few-shot test set |                |
|--------------|-------------------|----------------|
|              | AUROC             | AUPRC          |
| DeepConv-DTI | 0.8973±0.0162*    | 0.9431±0.0149* |

|                 |                      |                      |
|-----------------|----------------------|----------------------|
| GraphDTA        | 0.9391±0.0131*       | 0.9675±0.0148*       |
| Deeppurpose     | 0.9545±0.0063*       | 0.9487±0.0095*       |
| AI-bind         | 0.9572±0.0125*       | 0.9418±0.0148*       |
| DrugBAN         | 0.9114±0.0088*       | 0.9281±0.0052*       |
| <b>ZeroBind</b> | <b>0.9721±0.0068</b> | <b>0.9832±0.0048</b> |

\*P-value of two-sided t-test is <0.05

**Supplementary Table 3. The protein names and the PDB IDs used in COVID datasets.**

| Protein name                                       | PDB ID |
|----------------------------------------------------|--------|
| nucleocapsid protein N-terminal RNA binding domain | 6M3M   |
| ORF7A encoded accessory protein                    | 6W37   |
| u1S2q 1-RBD Up Spike Protein Trimer                | 6X2A   |
| ORF3a                                              | 6XDC   |
| main protease                                      | 6Y2E   |
| Orf9b                                              | 6Z4U   |
| ORF8 accessory protein                             | 7JTL   |
| Main Protease (Mpro) H172Y Mutant                  | 8D4J   |
